# Supplementary material
Source: PubMed Central journal article supplement (PMC7990024)
Supplement: NIHMS1677111-supplement-1.pdf [file NIHMS1677111-supplement-1.pdf]

**Cell Reports, Volume 34**

**Supplemental information**

**Disruption of DNA polymerase  $\zeta$  engages  
an innate immune response**

**Sara K. Martin, Junya Tomida, and Richard D. Wood**

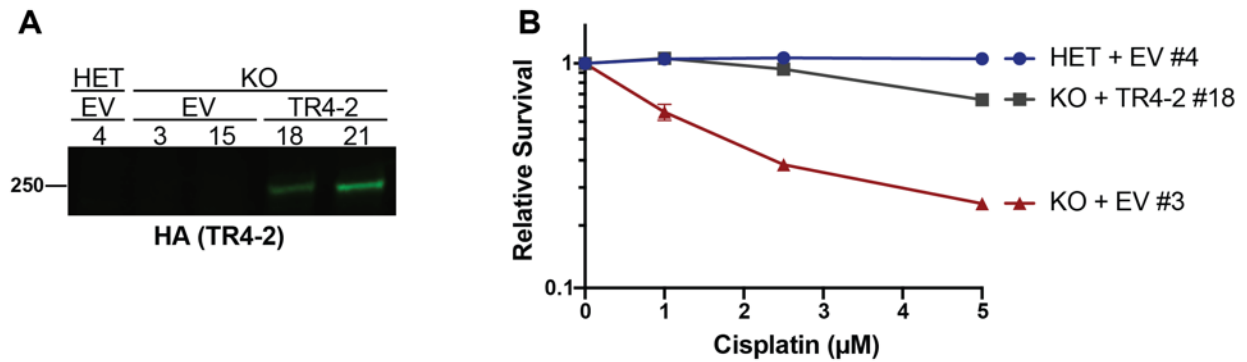

**Figure S1. Shortened REV3L construct rescues phenotypes of pol  $\zeta$  disruption in an additional set of clones, Related to Figure 1**

(A) Stable expression of TR4-2 with an N-terminal Flag-HA tag in *Rev3l* KO clones as detected by HA immunoblot. For REVERT total protein loading control see Fig 1 and S1 in Mendeley Data: [doi: 10.17632/5348dsphz.1](https://doi.org/10.17632/5348dsphz.1)

(B) Stable expression of TR4-2 in *Rev3l* KO MEF clones reverses hypersensitivity to cisplatin. MEFs were exposed to the indicated cisplatin concentrations for 48 hr and relative survival was quantified with the ATPlite assay.

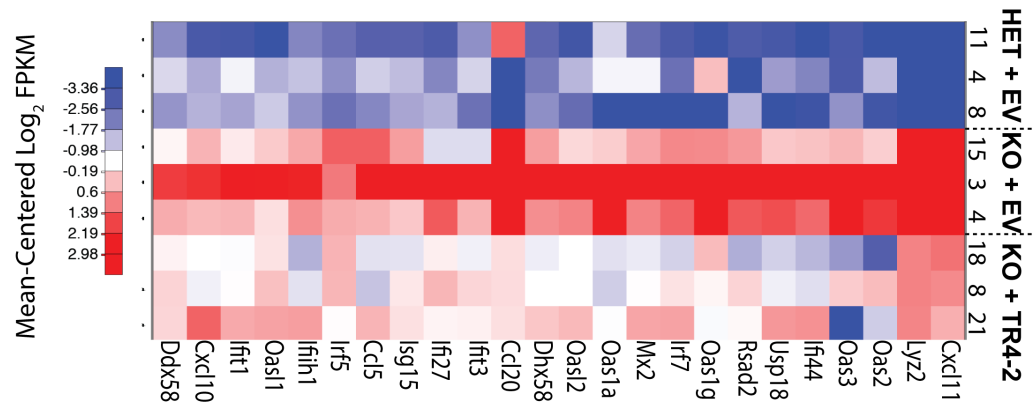

**Figure S2. Heatmap of expression of 24 interferon-stimulated genes, Related to Figure 2**  
 The heatmap was generated with the same RNA-seq data, genes and samples as in Fig 2D and Table S1.

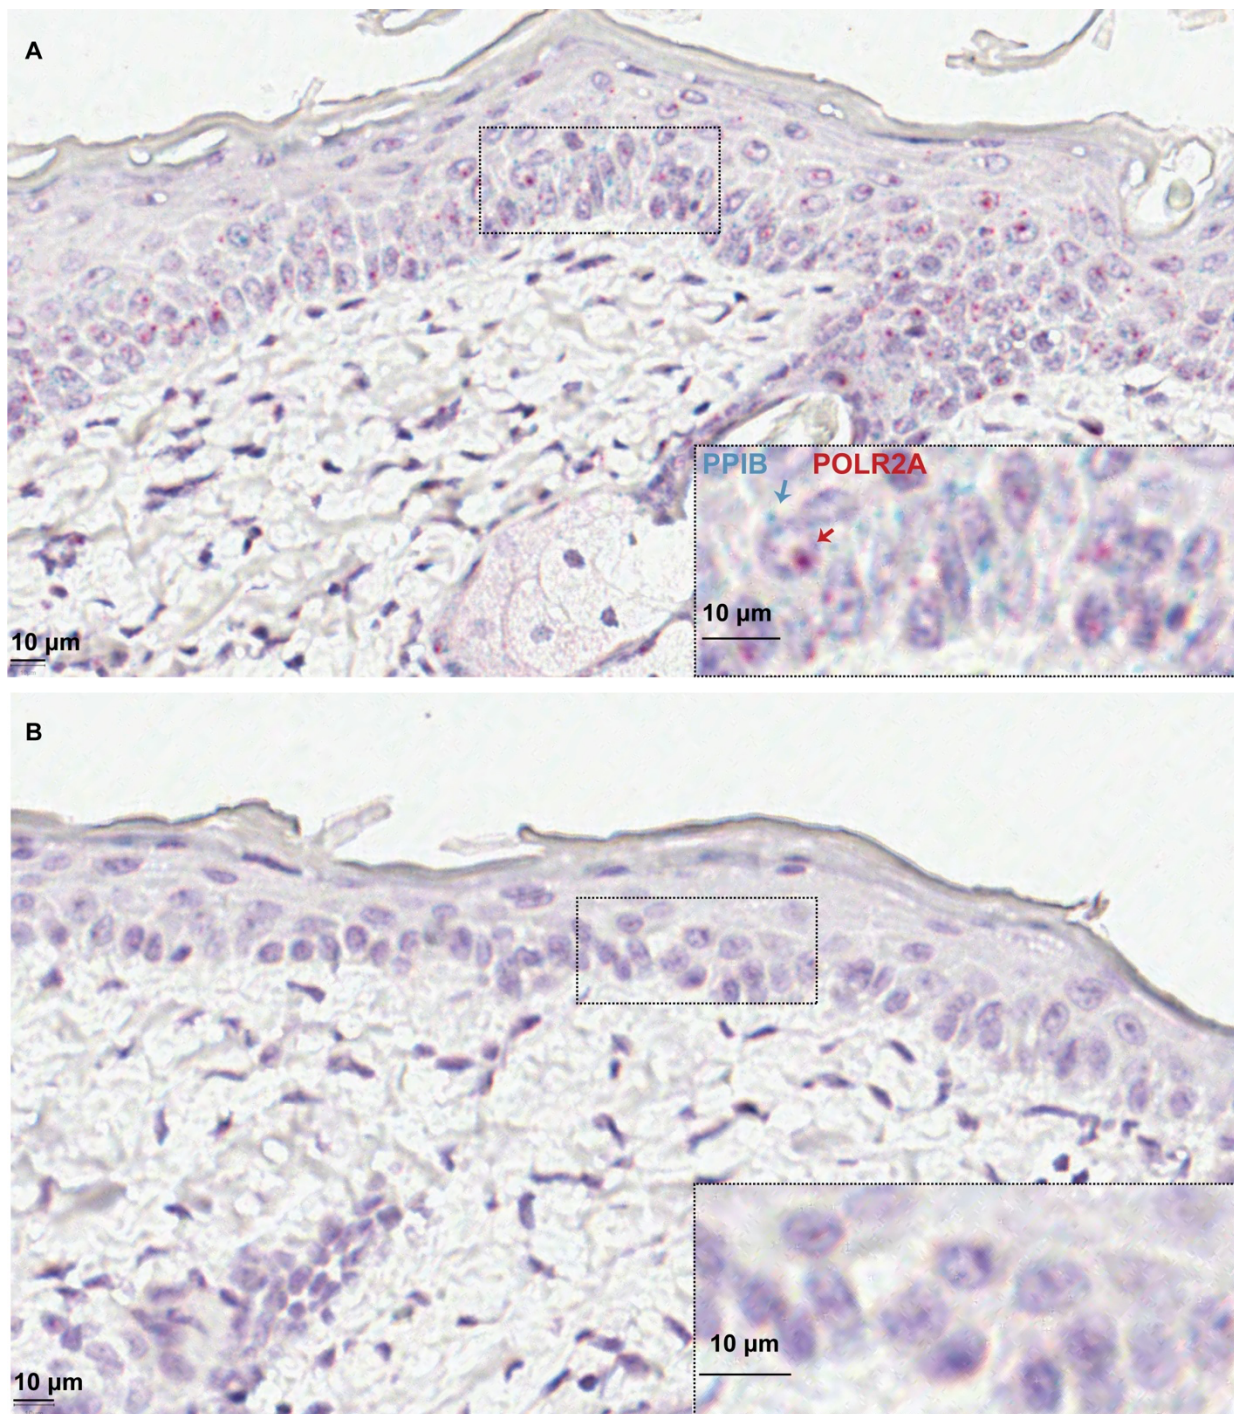

**Figure S3. Positive and Negative controls for single-molecule RNA in situ hybridization, Related to Figure 3.**  
 (A) Positive Control. Skin section of a keratin 5 conditional heterozygous *Rev3l* mouse (BK.5 Cre *Rev3l*<sup>+/lox</sup>) was analyzed with RNA in situ hybridization probes specific for the housekeeping genes *Ppib* (blue dots) and *Polr2a* (red dots). Arrows point to one example of probe signals.  
 (B) Negative control. Single-molecule RNA in situ hybridization in skin of keratin 5 conditional heterozygous *Rev3l* mouse (BK.5 Cre *Rev3l*<sup>+/lox</sup>) using a probe specific for the *Bacillus subtilis* *dapB* gene. As expected, no signal is detected.

| Gene Name     | Rev3/ KO + EV vs Rev3/ HET + EV |          | Rev3/ KO + TR4-2 vs Rev3/ KO + EV |          |
|---------------|---------------------------------|----------|-----------------------------------|----------|
|               | Log2 Fold Change                | FDR      | Log2 Fold Change                  | FDR      |
| <i>Cxcl11</i> | 10.08783                        | 1.43E-08 | -5.0312                           | 0.000362 |
| <i>Lyz2</i>   | 8.870484                        | 1.31E-09 | -4.772444                         | 1.91E-05 |
| <i>Oas2</i>   | 8.267013                        | 3.67E-05 | -6.567388                         | 0.002339 |
| <i>Oas3</i>   | 7.959514                        | 3.31E-06 | -6.542195                         | 0.000362 |
| <i>Ifi44</i>  | 7.479926                        | 1.44E-06 | -4.825919                         | 0.003736 |
| <i>Usp18</i>  | 6.572054                        | 7.54E-07 | -4.059615                         | 0.005592 |
| <i>Rsad2</i>  | 6.196355                        | 3.40E-05 | -4.282616                         | 0.01059  |
| <i>Oas1g</i>  | 6.161099                        | 0.000707 | -5.145596                         | 0.011973 |
| <i>Irf7</i>   | 5.839463                        | 5.85E-11 | -3.041723                         | 0.001875 |
| <i>Mx2</i>    | 4.957664                        | 0.000188 | -3.258566                         | 0.041769 |
| <i>Oas1a</i>  | 4.870041                        | 0.000783 | -4.308707                         | 0.009657 |
| <i>Oasl2</i>  | 4.500346                        | 9.79E-08 | -2.551515                         | 0.010097 |
| <i>Dhx58</i>  | 4.068542                        | 2.92E-09 | -2.264432                         | 0.004736 |
| <i>Ccl20</i>  | 4.171942                        | 0.004204 | -4.143873                         | 0.013561 |
| <i>Ifit3</i>  | 3.995032                        | 9.81E-05 | -2.691874                         | 0.032516 |
| <i>Ifi27</i>  | 3.896872                        | 1.04E-07 | -1.961613                         | 0.035    |
| <i>Isg15</i>  | 3.587676                        | 2.05E-07 | -2.203871                         | 0.007627 |
| <i>Ccl5</i>   | 3.546222                        | 3.94E-06 | -2.176328                         | 0.021028 |
| <i>Irf5</i>   | 3.182247                        | 5.70E-05 | -0.922754                         | 0.53922  |
| <i>Ifih1</i>  | 3.155781                        | 1.23E-06 | -1.783102                         | 0.032395 |
| <i>Oasl1</i>  | 3.143506                        | 0.000161 | -1.113838                         | 0.441074 |
| <i>Ifit1</i>  | 3.131239                        | 6.84E-05 | -1.706951                         | 0.113497 |
| <i>Cxcl10</i> | 3.042178                        | 8.26E-06 | -0.810127                         | 0.544102 |
| <i>Ddx58</i>  | 2.516276                        | 2.12E-07 | -1.110754                         | 0.114366 |

**Table S1. Log2 Fold Change of 24 selected interferon stimulated genes, Related to Figure 2**

| Species | Target        | Direction | Sequence (5' to 3')    | Source                 |
|---------|---------------|-----------|------------------------|------------------------|
| Mouse   | <i>Hprt</i>   | Forward   | CTGGTGAAAAGGACCTCTCG   | Mackenzie et al., 2016 |
| Mouse   | <i>Hprt</i>   | Reverse   | CAAGGGCATATCCAACAACA   | Mackenzie et al., 2016 |
| Mouse   | <i>Ccl5</i>   | Forward   | ACGTCAAGGAGTATTTCTACAC | Mackenzie et al., 2016 |
| Mouse   | <i>Ccl5</i>   | Reverse   | GATGTATTCTTGAACCCACT   | Mackenzie et al., 2016 |
| Mouse   | <i>Cxcl11</i> | Forward   | AGGAAGGTCACAGCCATAGC   | Yang et al., 2007      |
| Mouse   | <i>Cxcl11</i> | Reverse   | CGATCTCTGCCATTTTGACG   | Yang et al., 2007      |
| Mouse   | <i>Rsad2</i>  | Forward   | ATAGTGAGCAATGGCAGCCT   | West et al., 2015      |
| Mouse   | <i>Rsad2</i>  | Reverse   | AACCTGCTCATCGAAGCTGT   | West et al., 2015      |
| Mouse   | <i>Ifih1</i>  | Forward   | CGGAAGTTGGAGTCAAAGC    | West et al., 2015      |
| Mouse   | <i>Ifih1</i>  | Reverse   | TTTGTTCACTCTGAGTCATGG  | West et al., 2015      |
| Mouse   | <i>Isg15</i>  | Forward   | CTAGAGCTAGAGCCTGCAG    | West et al., 2015      |
| Mouse   | <i>Isg15</i>  | Reverse   | AGTTAGTCACGGACACCAG    | West et al., 2015      |
| Mouse   | <i>Irf7</i>   | Forward   | CAATTCAGGGGATCCAGTTG   | West et al., 2015      |
| Mouse   | <i>Irf7</i>   | Reverse   | AGCATTGCTGAGGCTCACTT   | West et al., 2015      |

**Table S2. Primers used for qPCR in this study, Related to STAR Methods.**
